# Supplementary material for: Measurement report: Molecular-level investigation of atmospheric cluster ions at the tropical high-altitude research station Chacaltaya (5240 m a.s.l.) in the Bolivian Andes
Source: Copernicus journal article supplement (doi:10.5194/acp-23-4559-2023), 2023-04-14
Supplement: Supplementary file 1 [file acp-23-4559-2023-supplement.pdf]

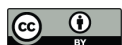

*Supplement of*

**Measurement report: Molecular-level investigation of atmospheric cluster ions at the tropical high-altitude research station Chacaltaya (5240 m a.s.l.) in the Bolivian Andes**

**Qiaozhi Zha et al.**

*Correspondence to:* Wei Huang ([wei.huang@helsinki.fi](mailto:wei.huang@helsinki.fi)) and Federico Bianchi ([federico.bianchi@helsinki.fi](mailto:federico.bianchi@helsinki.fi))

The copyright of individual parts of the supplement might differ from the article licence.

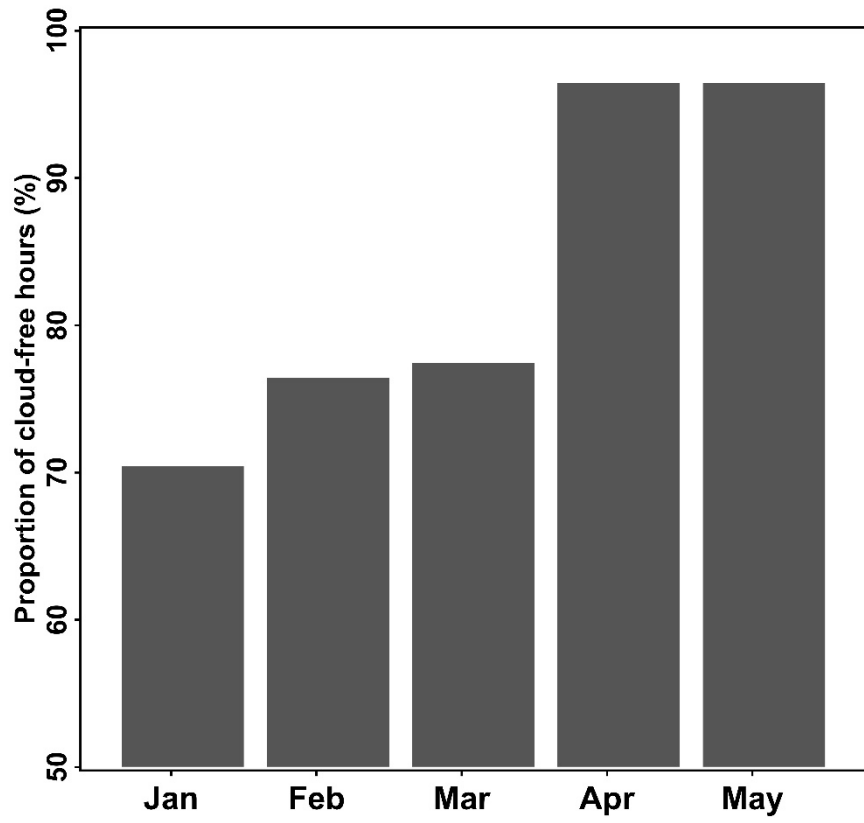

1  
2 Figure S1 Proportions of cloud-free hours to the total measurement time from January  
3 to May 2018.

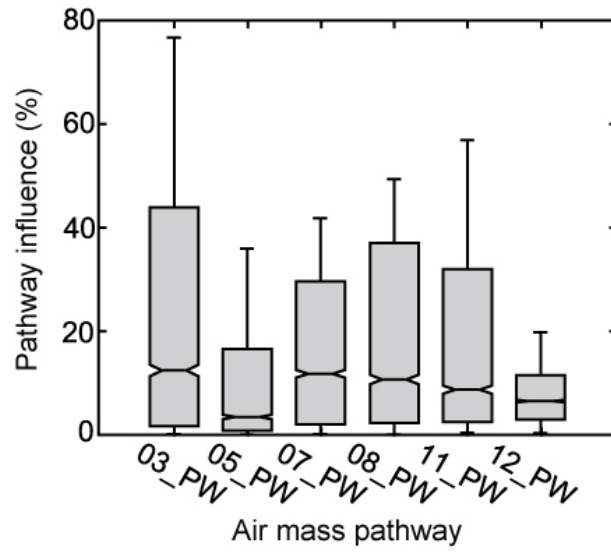

4

5 Figure S2 Influence of different pathways ( $SRR[\%]_{\text{pathway}}$ ) averaged over the 5-month  
6 campaign.

7

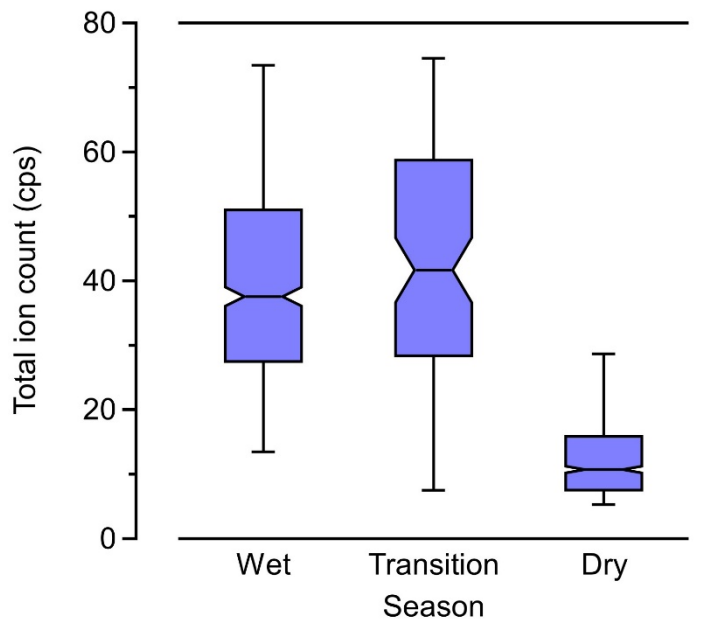

8

9 Figure S3 The TIC of negative ions measured by the APi-TOF in wet, wet-to-dry  
10 transition, and dry seasons at CHC. Data are in 1-hour time resolution.

11

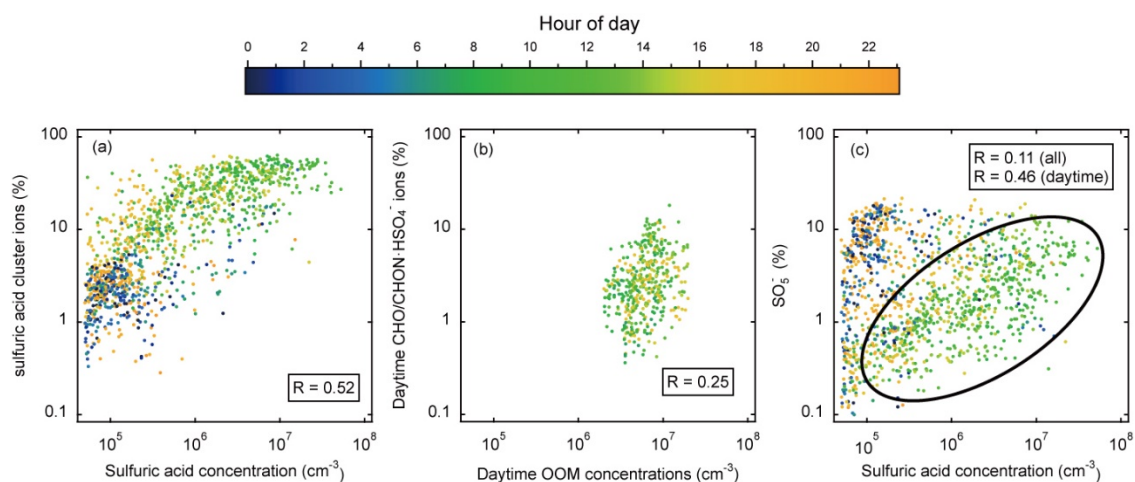

12

13 Figure S4 Relationships between (a) concentration of neutral H<sub>2</sub>SO<sub>4</sub> and signal fraction  
 14 of the (H<sub>2</sub>SO<sub>4</sub>)<sub>0-3</sub>·HSO<sub>4</sub><sup>-</sup> ion group; (b) daytime concentration of OOM and signal  
 15 fraction of CHO/CHON·HSO<sub>4</sub><sup>-</sup>; and (c) concentration of H<sub>2</sub>SO<sub>4</sub> and signal fraction of  
 16 SO<sub>5</sub><sup>-</sup>. The black circle in panel (d) denotes the “daytime branch” of data points. The  
 17 signal fractions of (H<sub>2</sub>SO<sub>4</sub>)<sub>0-3</sub>·HSO<sub>4</sub><sup>-</sup> and SO<sub>5</sub><sup>-</sup> ion groups were measured with the APi-  
 18 TOF. Concentration of H<sub>2</sub>SO<sub>4</sub> was measured with the CI-APi-TOF.

19

20

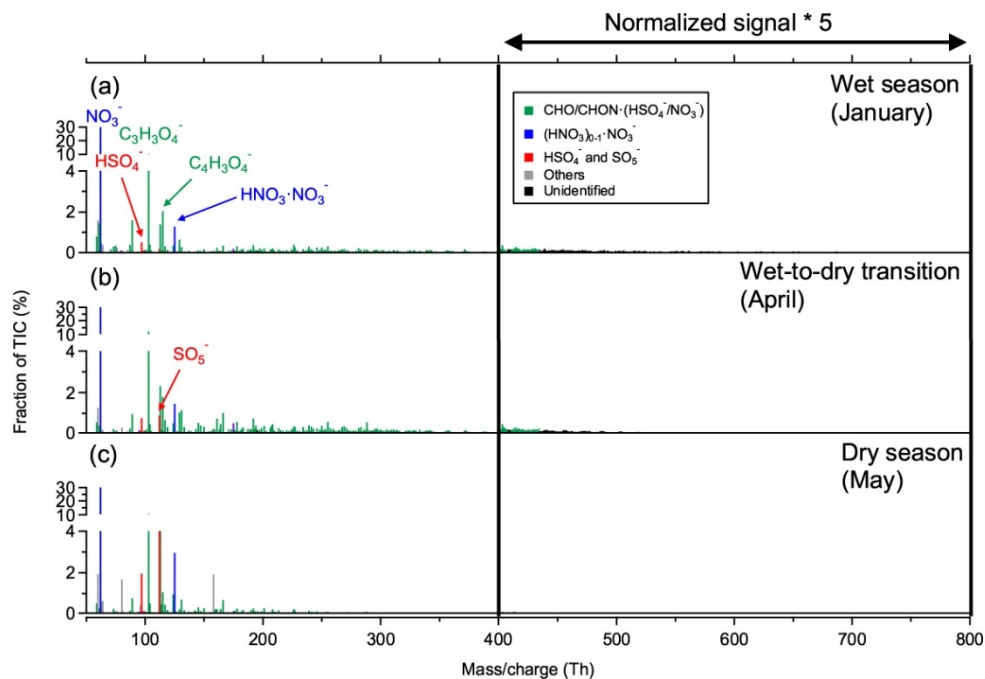

21  
22  
23  
24  
25  
26

Figure S5 Mass spectra of negative ions at CHC averaged between 19:00 – 07:00 in **(a)** wet season (January), **(b)** wet-to-dry transition period (April), and **(c)** dry season (May). The normalized signal intensities from 400 Th to 800 Th are multiplied by a factor of 5 for better visualization.

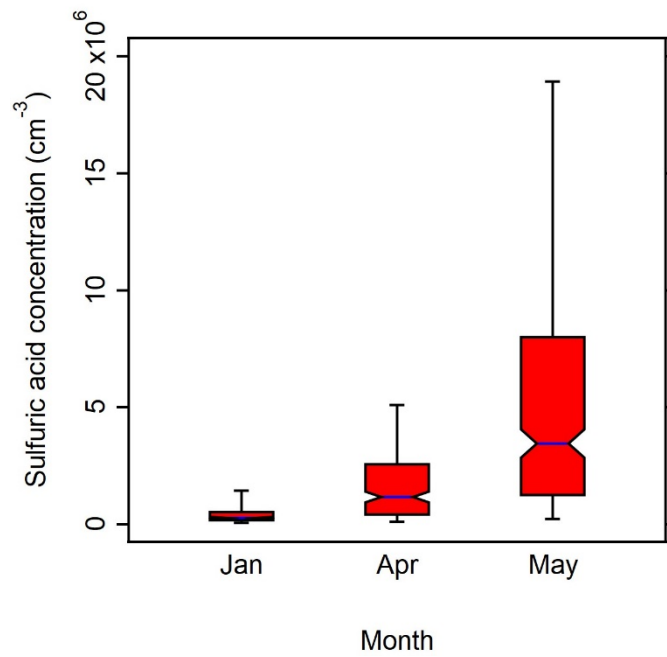

27

28 Figure S6 Daytime (07:00 – 19:00) neutral sulfuric acid concentrations measured with  
29 the CI-APi-TOF at the CHC during the study period when CI-APi-TOF data were  
30 available. Lower and upper limits of the error bars represent 25<sup>th</sup> and 75<sup>th</sup> percentiles,  
31 respectively.

32

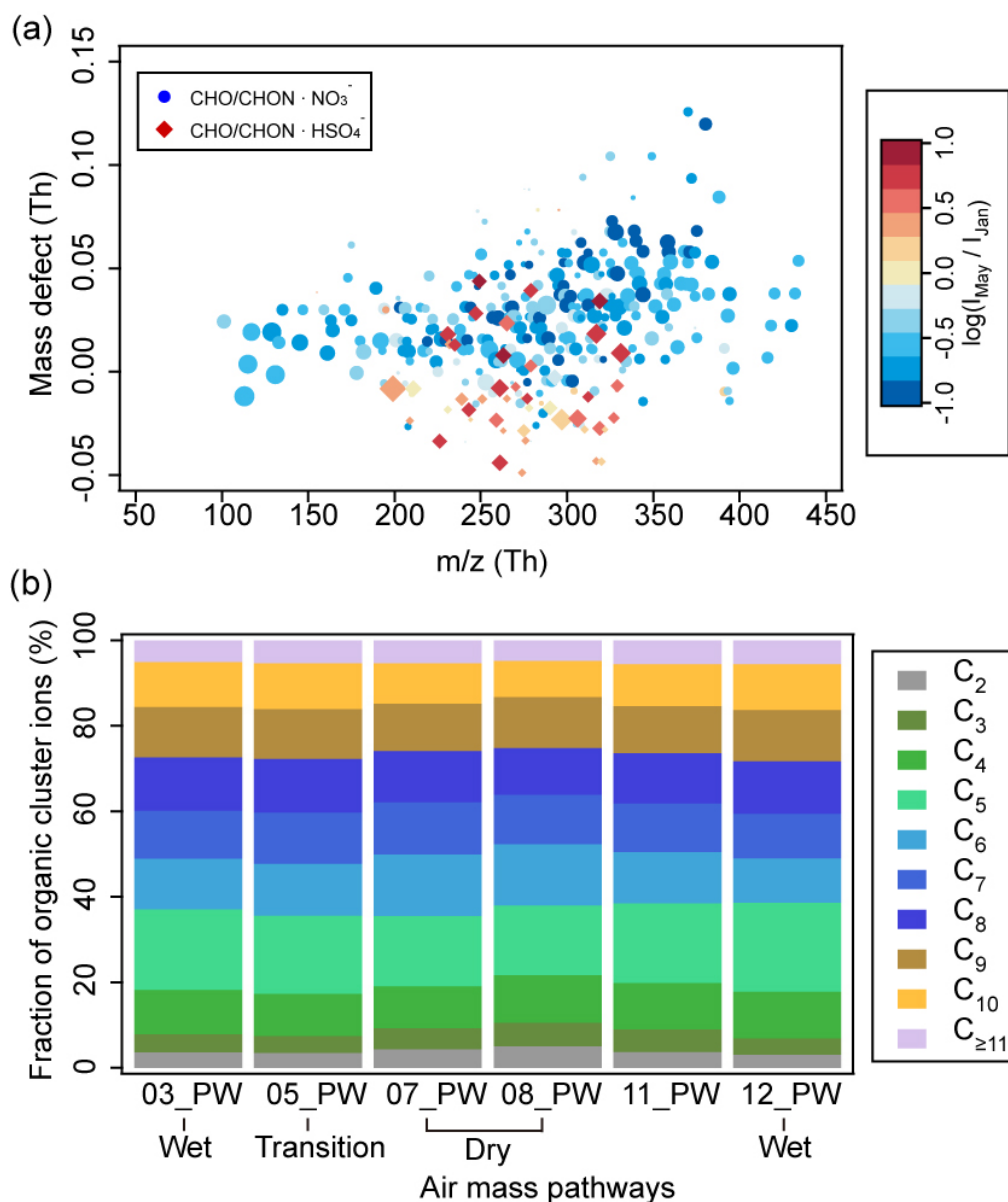

34

35 Figure S7 (a) Mass defect plot of organic cluster ions during daytime (07:00-19:00).  
 36 The color code indicates ratios (in log scale) between median signals of each ion  
 37 detected in May ( $I_{\text{May}}$ ) of dry season and January ( $I_{\text{Jan}}$ ) of wet season. The marker size  
 38 is proportional to the log-transformed ion's median signals in May. (b) Fraction of  
 39 organic cluster ions from different air mass pathways as a function of carbon atom  
 40 numbers during daytime (07:00-19:00). Noted that MA-derived ions were not included  
 41 in both panels.

42

43



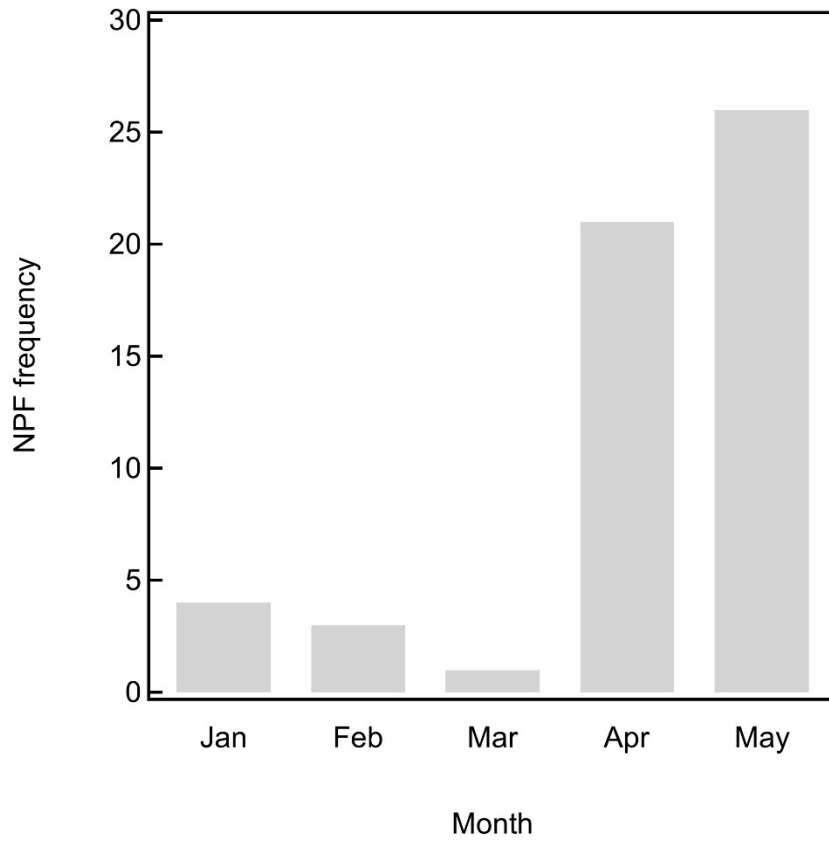

44

45 Figure S8 Frequency of NPF events at CHC from January to May 2018.

46

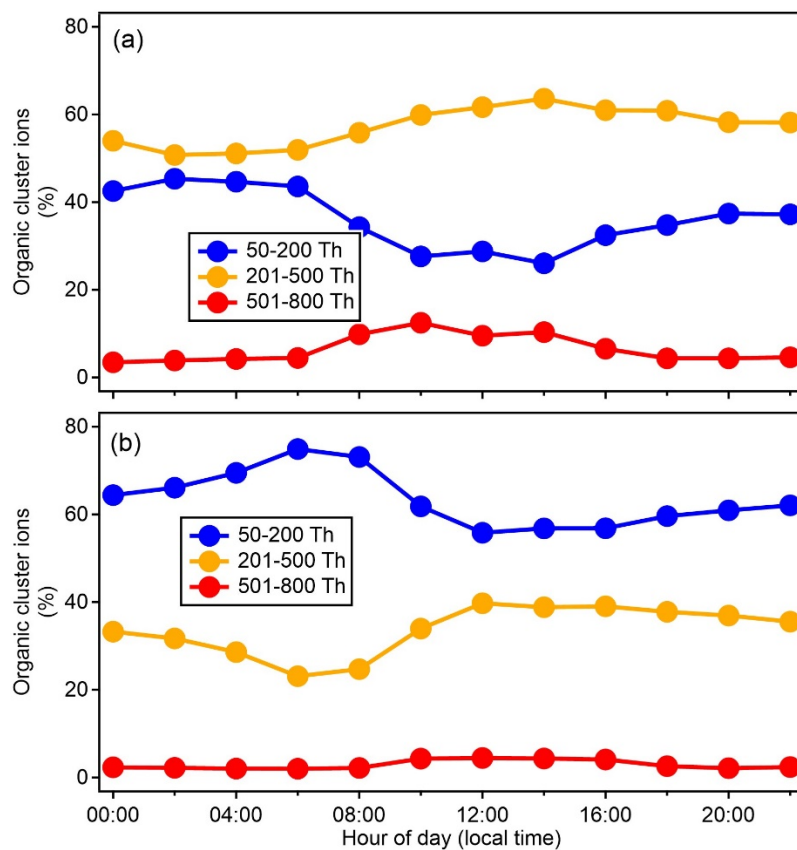

47

48 Figure S9 Variations of positive organic cluster ions in different mass ranges averaged  
 49 during (a) NPF days and (b) non-NPF days in February and March 2018.

50

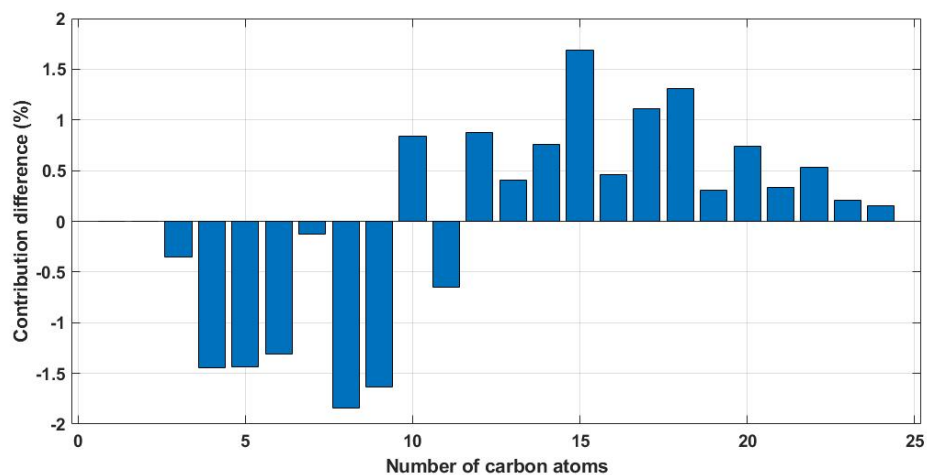

51  
 52 Figure S10 Difference in the identified positive organic cluster ions (median values)  
 53 observed before (06:00-08:00) and during (10:00-12:00) the NPF events in February  
 54 2018 (i.e., 18–19 February). Positive values refer to higher contributions during the  
 55 NPF events, and negative values higher contributions before the NPF events.

56  
 57
